1 **Point-of-Care Ultrasound (POCUS) Predicts Clinical Outcomes in Patients with COVID-**  
2 **19.**

3  
4 Andre Kumar, MD, MEd<sup>1</sup>, Isabel Weng<sup>2</sup>, MS, Sally Graglia, MD, MPH<sup>3</sup>, Thomas Lew, MD<sup>1</sup>,  
5 Kavita Gandhi, MD, PhD<sup>3</sup>, Farhan Lalani, MD<sup>4</sup>, David Chia, MD<sup>4</sup>, Youyou Duanmu, MD,  
6 MPH<sup>5</sup>, Trevor Jenson, MD<sup>4</sup>, Viveta Lobo, MD<sup>5</sup>, Jeffrey Nahn, MD<sup>3</sup>, Nicholas Iverson, MD<sup>4</sup>,  
7 Molly Rosenthal, MD<sup>4</sup>, June Gordon, MD<sup>1</sup>, John Kugler, MD<sup>1</sup>, Minh Chi Tran, MD<sup>1</sup>, Xiaolin  
8 Jia, MD<sup>1</sup>, Charles Liao, MD<sup>1</sup>, Alice Cha, MD<sup>1</sup>, Evan Baum, MD<sup>1</sup>, Douglas Halket, MD<sup>1</sup>, Jai  
9 Madhok, MD<sup>1</sup>, Muhammad Fazal, MD<sup>1</sup>

10

11 1. Department of Medicine, Stanford University School of Medicine, Stanford, CA

12 2. Quantitative Sciences Unit, Stanford University, Stanford CA

13 3. Department of Emergency Medicine, University of California San Francisco, San Francisco,  
14 CA

15 4. Department of Medicine, University of California San Francisco, San Francisco, CA

16 5. Department of Emergency Medicine, Stanford University School of Medicine, Stanford, CA

17

18 Corresponding Author:

19 Andre Kumar, MD

20 Stanford University School of Medicine

21 300 Pasteur Drive

22 Stanford, CA 95401

23 [Akumar3@stanford.edu](mailto:Akumar3@stanford.edu)

24 Phone- 650-723-2300

25

26 Tables List:

27 Table 1. Patient Demographics

28 Table 2: POCUS Findings and Primary Outcome

29 Table 3. Secondary Outcomes and POCUS findings

30

31 Figures List:

32 Figure 1. Scanning Protocol and Lung Ultrasound Findings in COVID-19 Patients.

33

34 Keywords: POCUS, ultrasound, Covid-19, coronavirus, SARS-CoV-2, Mortality, ICU, outcomes

35 Running Title: POCUS Outcomes COVID

36

37 Word Count—

38 Title Page: 221

39 Abstract: 244

40 Body: 2,365

41  
42  
43  
44  
45  
46  
47  
48  
49  
50  
51  
52  
53  
54  
55  
56  
57  
58  
59  
60  
61  
62  
63  
64  
65  
66  
67  
68  
69  
70  
71  
72  
73  
74  
75  
76  
77  
78  
79  
80

## Abstract

**Introduction:** Point-of-care ultrasound (POCUS) may detect the cardiopulmonary manifestations of COVID-19 and expediently predict patient outcomes.

**Methods:** We conducted a prospective cohort study at four medical centers from 3/2020-1/2021 to evaluate POCUS findings and clinical outcomes with COVID-19. Our inclusion criteria included adult patients hospitalized for COVID-19 who received cardiac or lung POCUS with a 12-zone protocol. Images were interpreted by two reviewers blinded to clinical outcomes. Our primary outcome was ICU admission incidence. Secondary outcomes included intubation and supplemental oxygen usage.

**Results:** N=160 patients (N=201 scans) were included. Scans were collected a median 23 hours (IQR:7-80) from emergency department triage. Triage POCUS findings associated with ICU admission included B-lines (OR 4.41 [95% CI:1.71-14.30];  $p<0.01$ ) or consolidation (OR 2.49 [95% CI:1.35-4.86];  $p<0.01$ ). B-lines were associated with intubation (OR 3.10 [95% CI:1.15-10.27];  $p=0.02$ ) and supplemental oxygen usage (OR 3.74 [95% CI:1.63-8.63;  $p<0.01$ ). Consolidations present on triage were associated with the need for oxygen at discharge (OR 2.16 [95% CI: 1.01-4.70];  $p=0.047$ ). A normal lung triage scan was protective for ICU admission (OR 0.28 [95% CI:0.09-0.75;  $p<0.01$ ) or need for supplemental oxygen during the hospitalization (OR 0.26 [95% CI:0.11-0.61];  $p<0.01$ ). Triage cardiac POCUS scans were not associated with any outcomes.

**Discussion:** Lung POCUS findings detected early in the hospitalization may provide expedient risk stratification for important COVID-19 clinical outcomes, including ICU admission, intubation, or need for oxygen on discharge. A normal admission scan appears protective against adverse outcomes, which may aid in triage decisions of patients.

81  
82  
83  
84  
85  
86  
87  
88  
89  
90  
91  
92  
93  
94  
95  
96  
97  
98  
99  
100  
101  
102  
103  
104  
105  
106  
107  
108  
109  
110  
111  
112  
113  
114  
115  
116  
117  
118  
119  
120  
121  
122  
123  
124  
125  
126

## Introduction

There is an urgent need to employ diagnostic modalities on the frontline of COVID-19 that are expedient, accurate, and cost-effective. Point-of-care ultrasound (POCUS) has garnered substantial interest as a potential modality to meet these needs for providers.<sup>1-3</sup> POCUS devices are cheaper than traditional imaging equipment, such as X-ray or computed tomography (CT) machines, which makes POCUS ideal for surge scenarios and other resource-limited settings.<sup>4</sup> Since providers using POCUS are concomitantly at the bedside assessing patients, POCUS permits an immediate and augmented evaluation of the patient, while potentially reducing personal protective equipment usage by radiology technicians and the need to decontaminate larger radiographic equipment.<sup>5</sup> Despite the potential for POCUS to improve clinical care for COVID-19, there is limited understanding on whether POCUS can predict clinical outcomes or impending deterioration.<sup>6,7</sup> In contrast, CT and X-ray findings predict important outcomes such as mechanical ventilation or death,<sup>8-10</sup> which support a broader trend of using imaging modalities to provide risk stratification with COVID-19.

Previously described cardiopulmonary manifestations of COVID-19 include pulmonary edema, consolidation, pleural-line irregularities, and cardiomyopathy.<sup>11-13</sup> POCUS can diagnose these pathological states with similar accuracy to computed tomography and echocardiography.<sup>14-17</sup> When compared to the “gold standard” of computed tomography, POCUS has a sensitivity and specificity of 83.2% and 90.3% for alveolar-interstitial syndromes and 82.7% and 90.2% for consolidation, respectively.<sup>18</sup> When compared to X-ray, POCUS is more sensitive at detecting the pulmonary manifestations of COVID-19.<sup>19</sup> The sonographic manifestations of COVID-19 pneumonia include bilateral B-lines, subpleural consolidations, pleural thickening, yet with surprising absence of pleural effusions.<sup>20-22</sup> These findings correlate with findings highly specific for COVID-19 observed with computed tomography (see Appendix for a full description of these sonographic findings and their CT correlates).<sup>20,22</sup>

There are few studies that examine the predictive utility of POCUS for COVID-19 despite recent findings that suggest imaging modalities may aid in risk stratification. In this study, we examine whether cardiopulmonary POCUS findings correlate with important clinical outcomes such as intensive care admission or need for supplemental oxygen usage, which carry substantial resource constraints. We also examine whether these findings, if detected early, are predictive of future clinical outcomes in the subsequent hospital course.

## Methods:

### *Participants & Setting*

This was a prospective cohort study conducted at four tertiary care centers in the United States from 3/2020 – 1/2021. Our inclusion criteria included adults hospitalized with COVID-19 (based on symptomatology<sup>23</sup> plus a confirmatory nasopharyngeal PCR for SARS-CoV-2) who received a POCUS examination. Patients who did not receive a POCUS scan were excluded. This study was approved by the Institutional Review Boards of Stanford University and the University of California, San Francisco. A waiver of consent was obtained by both institutions.

127  
128  
129  
130  
131  
132  
133  
134  
135  
136  
137  
138  
139  
140  
141  
142  
143  
144  
145  
146  
147  
148  
149  
150  
151  
152  
153  
154  
155  
156  
157  
158  
159  
160  
161  
162  
163  
164  
165  
166  
167  
168  
169  
170  
171  
172

*Outcomes*

In this exploratory analysis, previously described POCUS features for COVID-19 were compared against primary and secondary outcomes of clinical interest.<sup>11-13</sup> Our primary outcome was the incidence of ICU admission vs. not among patients who received a scan. Secondary outcomes included the incidence of intubation, supplemental oxygen usage during the hospitalization or discharge, and 30-day readmission.

*Scanning Protocol and Interpretation*

All patients included in this study were scanned during their initial evaluation in the emergency department or subsequent hospital days. Physician discretion determined whether to perform an initial or follow-up POCUS examination for each patient. For example, if a physician determined that a patient was clinically stable and there was no reason to perform a repeat scan, then the examination was deferred to avoid unnecessary physician exposure. Physicians were instructed to use a 12-zone scanning protocol for pulmonary views (Figure 1) and save 6 second clips of each lung zone.<sup>24</sup> If a 12-zone protocol could not be performed due to the patient’s condition (e.g. the posterior lung zones were not accessible due to intubation), then a modified 8-zone protocol capturing the anterior and lateral lung fields was performed.<sup>24</sup> This study utilized several POCUS devices, including Butterfly IQ™, Vave™, Lumify™, Mindray™, GE™, and Sonosite™, which represent the commercially-available portable machines at our institutions. All devices were set to the “lung” preset for lung scanning. In addition, providers acquired cardiac POCUS images using standard echocardiographic views (parasternal long axis, short axis, apical four-chamber, and subcostal) and “cardiac” presets for scanning. All collected images were saved to a local picture archiving and communication system (PACS) that was used for research purposes.

The POCUS scans were obtained by physicians credentialed in POCUS for patient care at their respective institutions. The physicians involved in scanning completed a 30-minute orientation to review the scanning protocol. A core group of researchers at each site interpreted the archived images based on consensus guidelines for LUS developed by the researchers (Appendix).<sup>24-26</sup> A full description of the credentials and experience of the scanners and image interpreters can be found in the Appendix. The researchers were blinded to patient outcomes when interpreting the images.

Previous investigations have demonstrated moderate to excellent interrater reliability (IRR) for LUS across different experience levels and probe types.<sup>27-29</sup> Nonetheless, we conducted our own IRR analysis within the context of COVID-19 and LUS. We found that LUS has moderate-to-substantial IRR for LUS among COVID-19 for the findings included in this study.<sup>30</sup> Based on our IRR findings, we developed an interpretation protocol. First, two researchers would independently apply the consensus guidelines (Appendix) to create a standardized approach to image interpretation. Next, they would input their findings into separate electronic forms. The researchers would then meet to compare their interpretations. If there was disagreement in interpretation, the two researchers would attempt to reach a consensus. If no consensus could be reached, then the data was excluded from the final database.

173

174

175 *Analysis*

176 Our calculated sample size for this study was 94 patients based on reasonable assumptions (15%  
177 event rate, 80% power, alpha 0.05). Event rates were based on internal data from our hospitals at  
178 the time of study design. For the main analysis comparing ICU admission vs. not, the unit of  
179 analysis was on each scan. Therefore, the analytical set could include multiple scans for one  
180 patient that met inclusion criteria. Subgroup analysis was limited to the initial scan per patient.  
181 Chi-square and Fisher exact testing were performed for categorical variables (depending on  
182 sample size), and t-tests for continuous variables. Mann Whitney tests were performed for non-  
183 normal distributed continuous variables instead of t-tests with median and interquartile ranges  
184 (IQR) reported. Odds ratios, corresponding 95% confidence intervals and p values from the  
185 models were reported. For POCUS features with low or high rates (<5%, >95%) of events, we  
186 performed Firth logistic regressions instead to obtain more reliable estimates. Poisson regression  
187 models were performed for POCUS ultrasound count features. All analysis was performed with  
188 R statistical programming languages version 4.0.3 (Vienna, Austria).

189

## 190 **Results**

### 191 *A. Patients & Scans*

192 The study was sufficiently powered to analyze the primary outcome. There were N=160 patients  
193 (N=201 lung ultrasounds and N=89 cardiac ultrasounds) included in the study (Tables 1 and 2).  
194 Approximately N=32 patients received multiple LUS scans on separate days, which accounts for  
195 the greater number of LUS scans than patients. All scans were collected a median 23 hours (IQR  
196 7-80 hours) after initial evaluation in the emergency department.

197

### 198 *B. Primary Outcome: ICU Admission*

199 Several LUS features were more common in patients who experienced ICU admission (Table 2).  
200 To assess the predictive utility of POCUS for ICU admission, we analyzed scans collected within  
201 24 hours of ER triage or before ICU admission (n=153 scans). Several early POCUS features  
202 were again associated with ICU admission (Table 2). These included the absolute presence of B-  
203 lines (OR 4.41 [95% CI: 1.71-14.30]; p<0.01) or consolidation (OR 2.49 [95% CI 1.35-4.86];  
204 p<0.01). The presence of either bilateral, anterior, or lateral B-lines or consolidations were  
205 similarly associated with ICU admission (Table 2). Protective factors against ICU admission  
206 included the presence of a normal lung scan (OR 0.28 [95% CI: 0.09-0.75]; p<0.01) or the  
207 presence of an A-line pattern in the majority of lung fields (OR 0.42 [95% CI: 0.21-0.81;  
208 p<0.01]. None of the patients who had an initially normal LUS within 24 hours of ED evaluation  
209 were admitted to the ICU in the subsequent 28 days.

210

### 211 *C. Secondary Outcomes: Intubation, Oxygen Usage, Readmission*

212 To assess the predictive utility of POCUS on secondary outcomes, scans that were collected  
213 within 24 hours of ER triage or before ICU admission (n=153 scans) were analyzed. Early LUS  
214 findings (Table 3) associated with intubation included anterior B-lines (OR 3.10 [95% CI: 1.15-  
215 10.27]; p=0.02) and anterior consolidation (OR 6.40 [95% CI: 1.80-34.01]; p<0.01).  
216 Supplemental oxygen usage during the hospitalization was associated with B-lines at triage (OR  
217 3.74 [95% CI: 1.63-8.63]; p<0.01), while a normal LUS at the time of triage was protective  
218 against oxygen usage for the hospitalization (OR 0.26 [95% CI: 0.11-0.61]; p<0.01).

219 Consolidations present on triage scans were associated with the need for oxygen at discharge  
220 (OR 2.16 [95% CI: 1.01-4.70]; p=0.047). No POCUS findings were significantly associated with  
221 30-day readmission, although there were several trends among specific patterns of B-lines or  
222 consolidations (Appendix).

223

#### 224 *D. Stability of Lung Ultrasound Findings Over Time*

225 The following analysis examined whether lung POCUS findings dynamically change over 28  
226 days from symptom onset. Patient scans (N=201) were stratified into quartiles by time since  
227 symptom onset to their scan (Days 0-6, 7-13, 14-20, and 21-28). All scans were collected a  
228 median 9 days (IQR: 5, 14.5) from symptom onset and did not differ from patients who  
229 experienced ICU admission vs. not (Table 1). Notably, POCUS findings did not significantly  
230 change over the 28-day period (Appendix). This stability was also observed for patients who  
231 experienced ICU admission vs. not (Appendix). Similarly, there was no difference when  
232 comparing early (days 0-7) vs. late (days 21+) scans (Appendix).

233

## 234 **Discussion**

235 In this prospective cohort study conducted at four medical centers, we characterize lung and  
236 cardiac POCUS findings present among patients hospitalized with COVID-19 and examine the  
237 predictive utility of these findings on clinical outcomes such as ICU admission. Several lung  
238 findings, including B-lines or consolidations, were associated with worsened outcomes such as  
239 ICU admission, intubation, or supplemental oxygen usage. Other findings, including a normal  
240 lung ultrasound or predominance of A-lines, were protective against several of these outcomes.  
241 When we confined our analysis to scans collected within 24 hours of ED triage, these findings  
242 were also predictive of clinical outcomes for the subsequent hospital course. Finally, these  
243 findings did not dynamically change over a 28-day window, suggesting that their presence,  
244 regardless of when they are detected, may be important clinical predictors.

245

246 POCUS is an expedient and cost-effective diagnostic modality that can be used in busy clinical  
247 departments to rapidly detect the cardiopulmonary manifestations of COVID-19.<sup>5,31</sup> POCUS may  
248 have similar predictive utility for outcomes compared to risk stratification systems that use  
249 radiographical or laboratory markers.<sup>8-10</sup> Previously described manifestations of COVID-19  
250 pneumonia include B-lines, subpleural consolidations, and a low frequency of pleural  
251 effusions.<sup>5,31</sup> These findings correlate with findings observed with COVID-19 with computed  
252 tomography (Appendix).<sup>20,22</sup> Several investigators have begun to develop scoring systems to  
253 stratify patients at risk for clinical deterioration using these POCUS findings.<sup>6,7,20,32</sup> Many of  
254 these scoring systems have demonstrable predictive utility,<sup>6,7</sup> but they also incorporate  
255 cumbersome scanning protocols of multiple zones and may only be utilized by highly motivated  
256 users. In contrast, our findings suggest that findings of meaningful predictive utility are located  
257 primarily in the anterior or lateral lungs, which can be successfully performed by providers with  
258 more limited experience.<sup>33</sup> Several of the findings (especially B-lines) have excellent interrater  
259 reliability and can be expediently learned.<sup>30,34,35</sup> Based on the results of this study, a rapid  
260 assessment of the anterior lungs may provide sufficient risk stratification and warrants further  
261 study.

262

263 A challenge for providers is what to do if a scan demonstrates high-risk features, yet the patient  
264 does not require critical care. In the COVID-19 era, it is not feasible for overcrowded ICUs to

265 accept patients who are “at risk” for deterioration. In this study, we observed that POCUS  
266 findings remained stable over the 28-day scanning period, which is consistent with previous  
267 observations for POCUS and COVID-19.<sup>36,37</sup> Therefore, the detection of these findings at any  
268 time point may be concerning and warrant close observation. A potential application for POCUS  
269 in COVID-19 is for augmented risk stratification for the need for admission or discharge.<sup>2</sup> Based  
270 on our results, if an otherwise stable patient presents with a normal lung ultrasound, a provider  
271 may be reassured for discharge, especially since POCUS findings for COVID-19 may remain  
272 stable over time. This practice may be supported by CT data that demonstrate pulmonary  
273 opacities often appear before symptomatology or clinical deterioration, suggesting that imaging  
274 findings can predict whether a patient will clinically worsen, even before becoming  
275 symptomatic.<sup>38</sup> Further studies are needed to assess the feasibility of POCUS to guide admission  
276 or discharge decisions.

277  
278 There are several limitations to this study. Certain patient conditions, such as intubation or  
279 patient mobility, prevented the provider from acquiring all 12 zones, particularly the posterior  
280 zones. Therefore, not all patients received a 12-zone scan, which limits the generalizability of the  
281 findings’ frequencies by location. Patients were scanned based on provider discretion, but it is  
282 possible that patients with certain features on X-ray or CT were more likely to receive a LUS.  
283 We did not control for patient health conditions that may have confounded the sonographic  
284 findings (e.g. interstitial lung disease), although these diseases had low prevalence in our  
285 population (Table 1). Finally, our population included only patients hospitalized for COVID-19.  
286 Therefore, our findings may not be generalizable to outpatient or triage settings, although other  
287 studies have examined the utility of POCUS in these venues.<sup>2,7,19</sup>

288  
289 In conclusion, POCUS may provide expedient risk stratification for patients hospitalized with  
290 COVID-19, and it may have similar utility as other scoring systems that utilize radiographical or  
291 laboratory markers. Several POCUS findings, including B-lines and consolidations, were  
292 predictive of ICU admission, intubation, subsequent supplemental oxygen usage, or the need for  
293 oxygen on discharge. The predictive utility of these findings was also present when we limited  
294 our analysis to scans collected within 24 hours of admission. Importantly, a normal lung  
295 ultrasound was protective against these outcomes, even among scans collected early in the  
296 hospitalization. Future studies should determine if POCUS can be utilized to appropriate triage  
297 or discharge patients with COVID-19, especially if a simplified protocol capturing the anterior or  
298 lateral lungs is used.

299  
300

### 30 References

302. Johri AM, Galen B, Kirkpatrick JN, Lanspa M, Mulvagh S, Thamman R. ASE Statement on  
303 Point-of-Care Ultrasound during the 2019 Novel Coronavirus Pandemic. J Am Soc  
304 Echocardiogr. 2020 Jun 1;33(6):670–3.
305. Calvo-Cebrián A, Alonso-Roca R, Rodríguez-Contreras FJ, Rodríguez-Pascual M de LN,  
306 Calderín-Morales MDP. Usefulness of Lung Ultrasound Examinations Performed by Primary  
307 Care Physicians in Patients With Suspected COVID-19. J Ultrasound Med [Internet]. 2020 Aug  
308 27; Available from: <http://dx.doi.org/10.1002/jum.15444>

309. Mathews BK, Koenig S, Kurian L, Galen B, Mints G, Liu G, et al. Clinical Progress Note: Point-of-Care Ultrasound Applications in COVID-19. J Hosp Med. 2020 Jun;15(6):353–5.  
310
314. Reynolds TA, Amato S, Kulola I, Chen C-JJ, Mfinanga J, Sawe HR. Impact of point-of-care ultrasound on clinical decision-making at an urban emergency department in Tanzania. PLoS One. 2018 Apr 25;13(4):e0194774.  
312  
313
315. Fox S, Dugar S. Point-of-care ultrasound and COVID-19. Cleve Clin J Med [Internet]. 2020 May 14; Available from: <http://dx.doi.org/10.3949/ccjm.87a.ccc019>  
315
316. Lu X, Zhang M, Qian A, Tang L, Xu S. Lung ultrasound score in establishing the timing of intubation in COVID-19 interstitial pneumonia: A preliminary retrospective observational study. PLoS One. 2020 Sep 3;15(9):e0238679.  
317  
318
319. Lichter Y, Topilsky Y, Taieb P, Banai A, Hochstadt A, Merdler I, et al. Lung ultrasound predicts clinical course and outcomes in COVID-19 patients. Intensive Care Med [Internet]. 2020 Aug 28; Available from: <http://dx.doi.org/10.1007/s00134-020-06212-1>  
320  
321
322. Chon Y, Kim JY, Suh YJ, Lee JY, Park JS, Moon SM, et al. Adverse Initial CT Findings Associated with Poor Prognosis of Coronavirus Disease. J Korean Med Sci. 2020 Aug 31;35(34):e316.  
323  
324
325. Liang W, Liang H, Ou L, Chen B, Chen A, Li C, et al. Development and Validation of a Clinical Risk Score to Predict the Occurrence of Critical Illness in Hospitalized Patients With COVID-19. JAMA Intern Med [Internet]. 2020 May 12; Available from: <http://dx.doi.org/10.1001/jamainternmed.2020.2033>  
326  
327  
328
329. Lanza E, Muglia R, Bolengo I, Santonocito OG, Lisi C, Angelotti G, et al. Quantitative chest CT analysis in COVID-19 to predict the need for oxygenation support and intubation. Eur Radiol [Internet]. 2020 Jun 26; Available from: <http://dx.doi.org/10.1007/s00330-020-07013-2>  
330  
331
332. Grillo F, Barisione E, Ball L, Mastracci L, Fiocca R. Lung fibrosis: an undervalued finding in COVID-19 pathological series. Lancet Infect Dis [Internet]. 2020 Jul 28; Available from: [http://dx.doi.org/10.1016/S1473-3099\(20\)30582-X](http://dx.doi.org/10.1016/S1473-3099(20)30582-X)  
333  
334
335. Argulian E, Sud K, Vogel B, Bohra C, Garg VP, Talebi S, et al. Right Ventricular Dilation in Hospitalized Patients with COVID-19 Infection. JACC Cardiovasc Imaging [Internet]. 2020 May 15; Available from: <http://dx.doi.org/10.1016/j.jcmg.2020.05.010>  
336  
337
338. Pagnesi M, Baldetti L, Beneduce A, Calvo F, Gramegna M, Pazzanese V, et al. Pulmonary hypertension and right ventricular involvement in hospitalised patients with COVID-19. Heart. 2020 Sep;106(17):1324–31.  
339  
340
341. Lucas BP, Candotti C, Margeta B, Evans AT, Mba B, Baru J, et al. Diagnostic accuracy of hospitalist-performed hand-carried ultrasound echocardiography after a brief training program. J Hosp Med. 2009 Jul;4(6):340–9.  
342  
343



3445. Alzahrani SA, Al-Salamah MA, Al-Madani WH, Elbarbary MA. Systematic review and meta-  
345 analysis for the use of ultrasound versus radiology in diagnosing of pneumonia. Crit Ultrasound  
346 J. 2017 Dec;9(1):6.
3476. Lichtenstein DA. BLUE-protocol and FALLS-protocol: two applications of lung ultrasound in  
348 the critically ill. Chest. 2015 Jun;147(6):1659–70.
3497. Grifoni S, Olivotto I, Cecchini P, Pieralli F, Camaiti A, Santoro G, et al. Utility of an integrated  
350 clinical, echocardiographic, and venous ultrasonographic approach for triage of patients with  
351 suspected pulmonary embolism. Am J Cardiol. 1998 Nov 15;82(10):1230–5.
3528. Chiumello D, Umbrello M, Sferrazza Papa GF, Angileri A, Gurgitano M, Formenti P, et al.  
353 Global and Regional Diagnostic Accuracy of Lung Ultrasound Compared to CT in Patients With  
354 Acute Respiratory Distress Syndrome. Crit Care Med. 2019 Nov;47(11):1599–606.
3559. Pare JR, Camelo I, Mayo KC, Leo MM, Dugas JN, Nelson KP, et al. Point-of-care Lung  
356 Ultrasound Is More Sensitive than Chest Radiograph for Evaluation of COVID-19. West J  
357 Emerg Med. 2020 Jun 19;21(4):771–8.
3580. Ottaviani S, Franc M, Ebstein E, Demaria L, Lheure C, Debray MP, et al. Lung ultrasonography  
359 in patients with COVID-19: comparison with CT. Clin Radiol [Internet]. 2020 Aug 12; Available  
360 from: <http://dx.doi.org/10.1016/j.crad.2020.07.024>
3621. Dini FL, Bergamini C, Allegrini A, Scopelliti M, Secco G, Miccoli M, et al. Bedside wireless  
362 lung ultrasound for the evaluation of COVID-19 lung injury in senior nursing home residents.  
363 Monaldi Arch Chest Dis [Internet]. 2020 Sep 2;90(3). Available from:  
364 <http://dx.doi.org/10.4081/monaldi.2020.1446>
3652. Fiala MJ. Ultrasound in COVID-19: a timeline of ultrasound findings in relation to CT. Clin  
366 Radiol. 2020 Jul;75(7):553–4.
3673. CDC. Coronavirus Disease 2019 (COVID-19) [Internet]. Centers for Disease Control and  
368 Prevention. 2020 [cited 2020 Apr 29]. Available from: [https://www.cdc.gov/coronavirus/2019-](https://www.cdc.gov/coronavirus/2019-nCoV/hcp/clinical-criteria.html)  
369 [nCoV/hcp/clinical-criteria.html](https://www.cdc.gov/coronavirus/2019-nCoV/hcp/clinical-criteria.html)
3704. Doerschug KC, Schmidt GA. Intensive care ultrasound: III. Lung and pleural ultrasound for the  
371 intensivist. Ann Am Thorac Soc. 2013 Dec;10(6):708–12.
3725. Reuss J. Sonography of the pleura. Ultraschall Med. 2010 Feb;31(1):8–22, quiz 23–5.
3736. Lobo V, Weingrow D, Perera P, Williams SR, Gharahbaghian L. Thoracic ultrasonography. Crit  
374 Care Clin. 2014 Jan;30(1):93–117, v – vi.
3757. Gomond-Le Goff C, Vivalda L, Foligno S, Loi B, Yousef N, De Luca D. Effect of Different  
376 Probes and Expertise on the Interpretation Reliability of Point-of-Care Lung Ultrasound. Chest.  
377 2020 Apr;157(4):924–31.

3728. Chiem AT, Chan CH, Ander DS, Kobylivker AN, Manson WC. Comparison of expert and  
379 novice sonographers' performance in focused lung ultrasonography in dyspnea (FLUID) to  
380 diagnose patients with acute heart failure syndrome. Acad Emerg Med. 2015 May;22(5):564–73.
3829. Vieira JR, Castro MR de, Guimarães T de P, Pinheiro AJT, Figueiredo ACTC, Martins BJ, et al.  
382 Evaluation of pulmonary B lines by different intensive care physicians using bedside  
383 ultrasonography: a reliability study. Rev Bras Ter Intensiva. 2019 Oct 14;31(3):354–60.
3840. Kumar A, Weng Y, Graglia S, Chung S, Duanmu Y, Lalani F, et al. Interobserver agreement of  
385 lung ultrasound findings of COVID-19. J Ultrasound Med [Internet]. 2021 Jan 11; Available  
386 from: <http://dx.doi.org/10.1002/jum.15620>
3871. Sorlini C, Femia M, Nattino G, Bellone P, Gesu E, Francione P, et al. The role of lung  
388 ultrasound as a frontline diagnostic tool in the era of COVID-19 outbreak. Intern Emerg Med  
389 [Internet]. 2020 Oct 22; Available from: <http://dx.doi.org/10.1007/s11739-020-02524-8>
3902. García Cruz E, Manzur Sandoval D, Rascón Sabido R, Gopar Nieto R, Barajas Campos  
391 RL, Jordán Ríos A, et al. Critical care ultrasonography during COVID-19 pandemic: The  
392 ORACLE protocol. Echocardiography. 2020 Aug 29;33:670.
3933. Lim JS, Lee S, Do HH, Oh KH. Can Limited Education of Lung Ultrasound Be Conducted to  
394 Medical Students Properly? A Pilot Study. Biomed Res Int. 2017 Mar 28;2017:8147075.
3954. Shumbusho JP, Duanmu Y, Kim SH, Bassett IV, Boyer EW, Ruutiainen AT, et al. Accuracy of  
396 Resident-Performed Point-of-Care Lung Ultrasound Examinations Versus Chest Radiography in  
397 Pneumothorax Follow-up After Tube Thoracostomy in Rwanda. J Ultrasound Med. 2020  
398 Mar;39(3):499–506.
3995. Kumar A, Weng Y, Wang L, Bentley J, Almli M, Hom J, et al. Portable Ultrasound Device  
400 Usage and Learning Outcomes Among Internal Medicine Trainees: A Parallel-Group  
401 Randomized Trial. J Hosp Med. 2020 Feb 11;15(2):e1–6.
4026. Zhang Y, Xue H, Wang M, He N, Lv Z, Cui L. Lung Ultrasound Findings in Patients With  
403 Coronavirus Disease (COVID-19). AJR Am J Roentgenol. 2020 Jul 22;1–5.
4047. Kumar AD, Chung S, Duanmu Y, Graglia S, Lalani F, Gandhi K, et al. Lung Ultrasound  
405 Findings in Patients Hospitalized with Covid-19 [Internet]. Infectious Diseases (except  
406 HIV/AIDS). medRxiv; 2020. Available from:  
407 <https://www.medrxiv.org/content/10.1101/2020.06.25.20140392v1.abstract>
4088. Inui S, Fujikawa A, Jitsu M, Kunishima N, Watanabe S, Suzuki Y, et al. Chest CT Findings in  
409 Cases from the Cruise Ship Diamond Princess with Coronavirus Disease (COVID-19).  
410 Radiology: Cardiothoracic Imaging. 2020 Apr 1;2(2):e200110.

411

412

413

414

415

416

| Characteristic                        | All COVID-19 Patients | Non-ICU Patients | ICU Patients    | p-value          |
|---------------------------------------|-----------------------|------------------|-----------------|------------------|
| <b>Number of Patients</b>             | 160                   | 106 (66%)        | 54 (34%)        | -                |
| <b>Median Age (IQR)</b>               | 58 (45-71)            | 55 (46-69)       | 60 (43-71)      | 0.85             |
| <b>Female</b>                         | 65 (41%)              | 46 (43%)         | 19 (35%)        | 0.45             |
| <b>Median BMI (IQR)</b>               | 28.9 (25-34)          | 28 (25- 34)      | 31 (26-36)      | 0.2              |
| <b>Mechanical Ventilation</b>         | 24 (15%)              | -                | 24 (44%)        | -                |
| <b>Death</b>                          | 7 (4%)                | -                | 7 (13%)         | -                |
| <b>Median Length of Stay (IQR)</b>    | 5 (3-12)              | 4 (2-6)          | 16 (9-25)       | <b>&lt;0.001</b> |
| <b>Supplemental Oxygen Usage</b>      | 102 (64%)             | 48 (64%)         | 54 (100%)       | <b>&lt;0.001</b> |
| <b>Discharged on Oxygen</b>           | 37 (42%)              | 15 (27%)         | 22 (65%)        | <b>&lt;0.001</b> |
| <b>Symptoms to Triage, Days (IQR)</b> | 6 [3-9]               | 7.0 [3.0,10.0]   | 6.0 [3.3,8.8]   | 0.60             |
| <b>Symptoms to Scan, Days (IQR)</b>   | 9 [5-14.5]            | 9.0 [5.0,12.0]   | 11.0 [5.6,17.0] | 0.08             |
| <b>Readmission at 30 Days</b>         | 14 (16%)              | 10 (16%)         | 4 (15%)         | 1.00             |
| <b>Medical Comorbidities</b>          |                       |                  |                 |                  |
| <b>Hypertension</b>                   | 68 (43%)              | 39 (37%)         | 29 (54%)        | 0.06             |
| <b>Diabetes</b>                       | 62 (39%)              | 38 (36%)         | 24 (44%)        | 0.38             |
| <b>Hyperlipidemia</b>                 | 57 (36%)              | 32 (30%)         | 25 (46%)        | 0.07             |
| <b>Chronic Kidney Disease</b>         | 22 (14%)              | 12 (11%)         | 10 (19%)        | 0.31             |
| <b>Coronary Artery Disease</b>        | 20 (13%)              | 15 (14%)         | 5 (9%)          | 0.53             |
| <b>Asthma</b>                         | 17 (11%)              | 12 (11%)         | 5 (9%)          | 0.89             |
| <b>Current Smoker</b>                 | 17 (11%)              | 11 (10%)         | 3 (6%)          | 1.00             |
| <b>History of Cancer</b>              | 15 (9.4%)             | 10 (9%)          | 5 (9%)          | 1.00             |
| <b>Congestive Heart Failure</b>       | 15 (9%)               | 11 (10%)         | 4 (7%)          | 0.75             |
| <b>COPD</b>                           | 11 (7%)               | 9 (9%)           | 2 (4%)          | 0.42             |
| <b>History of CVA</b>                 | 8 (5%)                | 7 (7%)           | 1 (2%)          | 0.36             |

417 Table 1. Patient Demographics. Bold items denote findings of statistical significance (p<0.05).  
 418 ICU, Intensive Care Unit; BMI, Body-Mass Index; COPD, Chronic Obstructive Pulmonary  
 419 Disease; CVA, Cerebrovascular Accident; IQR, interquartile range.

420

421

422

423

424

425

| Characteristic          | All Patients | Non-ICU Patients | ICU Patients | P-value         | OR (95% CI) From Early Scans | P-value         |
|-------------------------|--------------|------------------|--------------|-----------------|------------------------------|-----------------|
| No. of Scans            | 201          | 132 (66%)        | 69 (34%)     | -               | 153                          | -               |
| No. of 12-Zone Scans    | 115 (57%)    | 77 (58%)         | 38 (55%)     | -               | 51 (33%)                     | -               |
| Anterior Zone Scans     | 198 (99%)    | 130 (98%)        | 68 (99%)     | -               | 153 (100%)                   | -               |
| Lateral Zone Scans      | 188 (94%)    | 121 (92%)        | 67 (97%)     | -               | 153 (100%)                   | -               |
| Posterior Zone Scans    | 115 (57%)    | 77 (58%)         | 38 (55%)     | -               | 51 (33%)                     | -               |
| Normal Cardiac POCUS    | 78 (39%)     | 53 (40%)         | 25 (36%)     | 0.70            | 0.89 [0.48-1.64]             | 0.72            |
| Normal Lung POCUS       | 31 (15%)     | 27 (20%)         | 4 (6%)       | <b>0.01</b>     | 0.28 [0.09-0.75]             | <b>&lt;0.01</b> |
| Majority A-Line Pattern | 65 (32%)     | 51 (39%)         | 14 (20%)     | <b>0.01</b>     | 0.42 [0.21-0.81]             | <b>&lt;0.01</b> |
| B-Lines                 | 165 (82%)    | 100 (76%)        | 65 (94%)     | <b>&lt;0.01</b> | 4.41 [1.71-14.30]            | <b>&lt;0.01</b> |
| Bilateral               | 124 (62%)    | 71 (54%)         | 53 (77%)     | <b>&lt;0.01</b> | 2.63 [1.39-5.17]             | <b>&lt;0.01</b> |
| Anterior                | 121 (61%)    | 68 (52%)         | 53 (78%)     | <b>&lt;0.01</b> | 2.97 [1.55-5.93]             | <b>&lt;0.01</b> |
| Lateral                 | 132 (70%)    | 82 (68%)         | 50 (74%)     | 0.41            | 1.33 [0.69-2.63]             | 0.41            |
| Posterior               | 84 (72%)     | 51 (66%)         | 33 (85%)     | 0.06            | 2.4 [0.95-6.80]              | 0.07            |
| Consolidation           | 108 (54%)    | 60 (46%)         | 48 (70%)     | <b>&lt;0.01</b> | 2.49 [1.35-4.68]             | <b>&lt;0.01</b> |
| Translobar              | 5 (3%)       | 2 (2%)           | 3 (6%)       | 0.50            | 2.59 [0.49-16.00]            | 0.26            |
| Subpleural              | 100 (52%)    | 59 (47%)         | 41 (62%)     | 0.06            | 1.68 [0.92-3.12]             | 0.09            |
| Bilateral (any)         | 61 (30%)     | 31 (24%)         | 30 (44%)     | <b>&lt;0.01</b> | 2.35 [1.26-4.41]             | <b>&lt;0.01</b> |
| Anterior (any)          | 53 (54%)     | 21 (39%)         | 32 (71%)     | <b>&lt;0.01</b> | 3.81 [1.66-9.17]             | <b>&lt;0.01</b> |
| Lateral (any)           | 69 (68%)     | 32 (55%)         | 37 (84%)     | <b>&lt;0.01</b> | 3.71 [1.50-10.09]            | <b>&lt;0.01</b> |
| Posterior (any)         | 56 (82%)     | 39 (87%)         | 17 (74%)     | 0.33            | 0.45 [0.13-1.57]             | 0.21            |

426 Table 2. POCUS Findings and Primary Outcome. POCUS findings were compared between  
 427 patients admitted to the ICU vs. not. On sub-analysis, scans were analyzed if they were collected  
 428 within 24 hours of emergency department triage and ICU admission to examine the predictive  
 429 utility of early POCUS scans (expressed as odds ratios and 95% confidence intervals). Bold  
 430 items denote findings of statistical significance (p<0.05). ICU, intensive care unit; OR, odds  
 431 ratio; POCUS, point-of-care ultrasound.

432

433

434

435

436

437  
438  
439  
440

| Characteristic                 | Intubation OR<br>[95% CI] | p-value         | Required<br>Supplemental O <sub>2</sub><br>OR {95% CI] | p-value         | Required O <sub>2</sub> at<br>discharge OR<br>[95% CI] | p-value         |
|--------------------------------|---------------------------|-----------------|--------------------------------------------------------|-----------------|--------------------------------------------------------|-----------------|
| <b>Normal Cardiac POCUS</b>    | 1.78 [0.76-4.18]          | 0.18            | 1.36 [0.6-3.27]                                        | 0.75            | 0.5 [0.19-1.22]                                        | 0.13            |
| <b>Normal Lung POCUS</b>       | 0.32 [0.03-1.32]          | 0.13            | 0.26 [0.11-0.61]                                       | <b>&lt;0.01</b> | 0.58 [0.20-1.56]                                       | 0.29            |
| <b>Majority A-Line Pattern</b> | 0.53 [0.18-1.35]          | 0.19            | 0.9 [0.42-1.98]                                        | 0.79            | 0.67 [0.29-1.52]                                       | 0.35            |
| <b>B-Lines</b>                 | 3.82 [0.93-35.07]         | 0.07            | 3.74 [1.63-8.63]                                       | <b>&lt;0.01</b> | 1.58 [0.61-4.35]                                       | 0.35            |
| <b>Bilateral</b>               | 1.01 [0.43-2.48]          | 0.98            | 1.63 [0.78-3.43]                                       | 0.19            | 1.63 [0.76-3.58]                                       | 0.21            |
| <b>Anterior</b>                | 3.10 [1.15-10.27]         | <b>0.02</b>     | 2.93 [1.39-6.34]                                       | <b>&lt;0.01</b> | 1.93 [0.88-4.4]                                        | 0.10            |
| <b>Lateral</b>                 | 0.76 [0.32-1.96]          | 0.56            | 2.21 [1.01-4.81]                                       | <b>0.046</b>    | 1.27 [0.56-2.95]                                       | 0.57            |
| <b>Posterior</b>               | 1.92 [0.53-10.32]         | 0.34            | 1.43 [0.47-4.24]                                       | 0.53            | 1.35 [0.41-4.51]                                       | 0.62            |
| <b>Consolidation</b>           | 2.18 [0.91-5.70]          | 0.08            | 1.85 [0.88-4.05]                                       | 0.11            | 2.16 [1.01-4.70]                                       | <b>0.047</b>    |
| <b>Translobar</b>              | 6.38 [0.99-35.75]         | 0.05            | 1.07 [0.19-10.01]                                      | 0.95            | 2.47 [0.32-27.69]                                      | 0.38            |
| <b>Subpleural</b>              | 1.19 [0.51-2.89]          | 0.69            | 1.67 [0.79-5.30]                                       | 0.19            | 1.62 [0.76-3.50]                                       | 0.21            |
| <b>Bilateral (any)</b>         | 2.09 [0.88-4.92]          | 0.09            | 1.92 [0.79-5.3]                                        | 0.16            | 3.25 [1.35-8.11]                                       | <b>&lt;0.01</b> |
| <b>Anterior (any)</b>          | 6.40 [1.80-34.01]         | <b>&lt;0.01</b> | 2.71 [0.82-9.67]                                       | 0.10            | 2.85 [0.89-9.81]                                       | 0.08            |
| <b>Lateral (any)</b>           | 2.75 [0.76-14.74]         | 0.13            | 2.38 [0.64-8.5]                                        | 0.19            | 2.93 [0.83-11.66]                                      | 0.10            |
| <b>Posterior (any)</b>         | 0.55 [0.12-3.33]          | 0.48            | 0.8 [0.07-4.95]                                        | 0.82            | 1.53 [0.25-10.87]                                      | 0.64            |

441  
442 Table 3. Secondary Outcomes by POCUS Findings. Scans were analyzed if they were collected  
443 within 24 hours of emergency department triage to examine the predictive utility of early  
444 POCUS scans (expressed as odds ratios and 95% confidence intervals). Bold items denote  
445 findings of statistical significance (p<0.05). ICU, intensive care unit; OR, odds ratio; POCUS,  
446 point-of-care ultrasound.

447  
448  
449  
450  
451  
452  
453  
454  
455  
456  
457  
458  
459

## Scanning Protocol

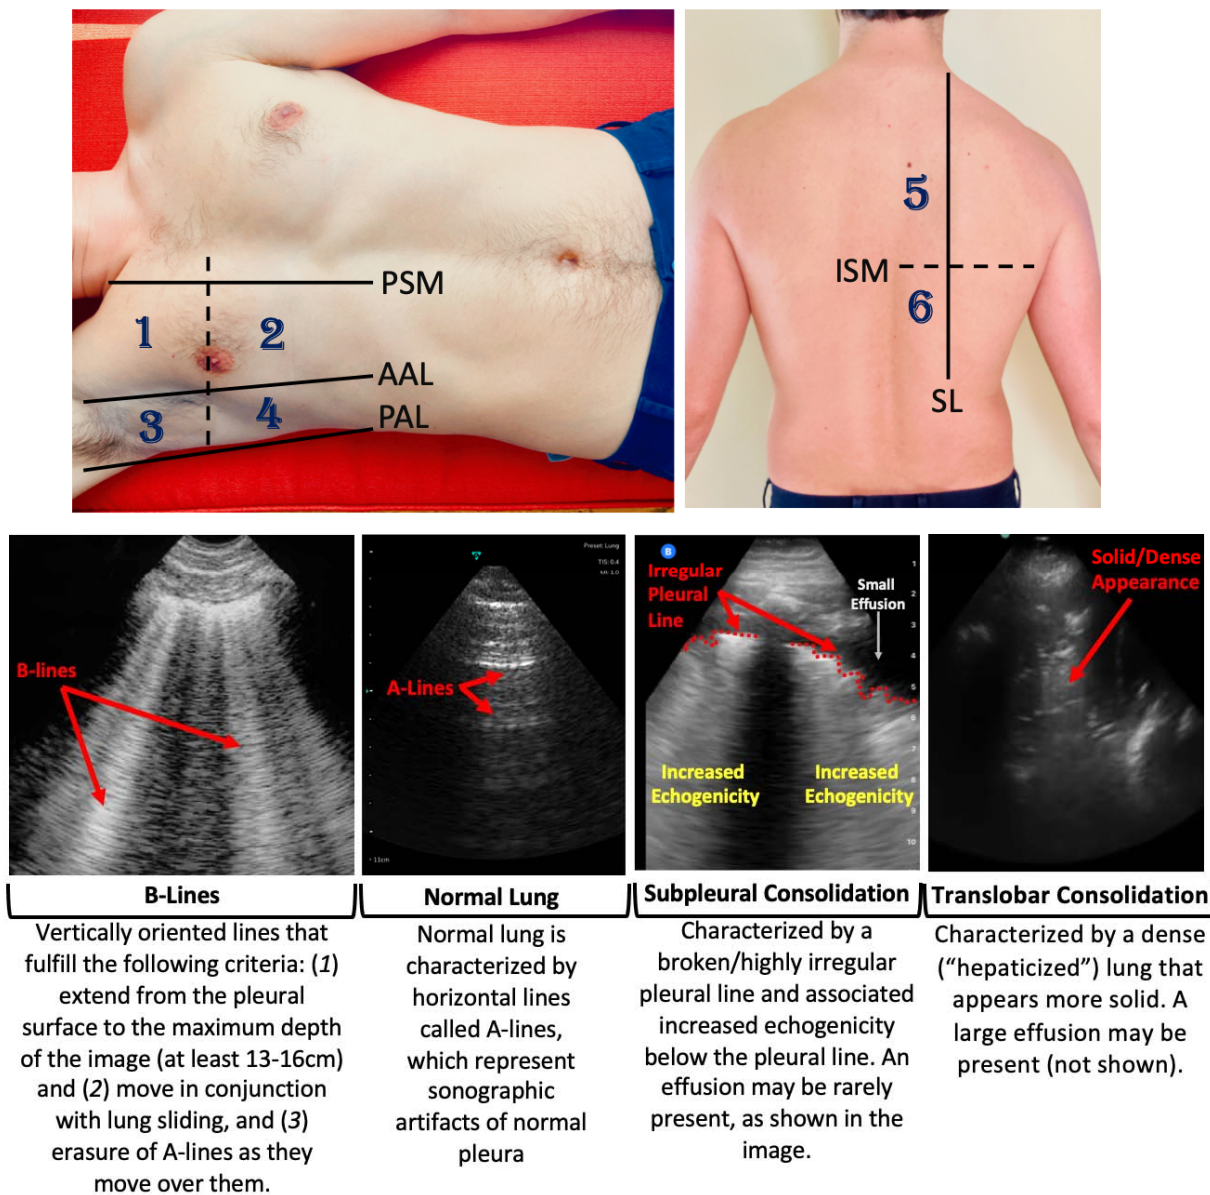

460  
 461 Figure 1. Scanning Protocol and Lung Ultrasound Findings in COVID-19 Patients. This study  
 462 utilized a 12-zone protocol. On each hemithorax, there are 6 zones. The exam begins on the  
 463 patient's right side. Zones 1-2 (anterior zones) are between the parasternal margin (PSM) and the  
 464 anterior axillary line (AAL) and are best obtained in the mid-clavicular line. Zones 3-4 (lateral  
 465 zones) are between the anterior axillary line (AAL) and posterior axillary line (PAL) and are best  
 466 obtained in the mid-axillary line. The nipple line serves as a bisecting area between these zones.  
 467 Zones 5-6 (posterior zones) are medial to the scapular line (SL) and are bisected by the inferior  
 468 scapular margin (ISM). The zone areas are repeated on the contralateral hemithorax (starting  
 469 with zone 7). If a 12-zone protocol could not be obtained, then an eight-zone protocol (which  
 470 excludes Zones 5-6) was obtained. This figure contains an overview of the observed ultrasound  
 471 findings based on previously described terminology (Appendix).
